# Supplementary material
Source: PubMed Central journal article supplement (PMC5543990)
Supplement: NIHMS885351-supplement-Supporting_info.pdf [file NIHMS885351-supplement-Supporting_info.pdf]

## Supporting Information

### **Pro-Inflammatory and Pro-Fibrogenic Effects of Ionic and Particulate Arsenide and Indium-Containing Semiconductor Materials in the Murine Lung**

*Wen Jiang<sup>†</sup>, Xiang Wang<sup>†</sup>, Olivia J. Osborne<sup>†</sup>, Yingjie Du<sup>†</sup>, Chong Hyun Chang<sup>†</sup>, Yu-Pei Liao<sup>‡</sup>, Bingbing Sun<sup>†</sup>, Jinhong Jiang<sup>†</sup>, Zhaoxia Ji<sup>†</sup>, Ruibin Li<sup>†§</sup>, Xiangsheng Liu<sup>‡</sup>, Jianqin Lu<sup>‡</sup>, Sijie Lin<sup>†◇</sup>, Huan Meng<sup>‡</sup>, Tian Xia<sup>†‡</sup> and André E. Nel<sup>†‡\*</sup>*

<sup>†</sup> Center for Environmental Implications of Nanotechnology, California NanoSystems Institute, University of California Los Angeles, 570 Westwood Plaza, Los Angeles, CA 90095, United States;

<sup>‡</sup> Division of NanoMedicine, Department of Medicine, University of California Los Angeles, 10833 Le Conte Ave, Los Angeles, CA 90095, United States;

<sup>◇</sup> College of Environmental Science and Engineering State Key Laboratory of Pollution Control and Resource Reuse, Tongji University, Shanghai, China, 200092

<sup>§</sup> School of Radiation Medicine and Protection & School for Radiological and Interdisciplinary Sciences (RAD-X), Medical College of Soochow University, Suzhou, Jiangsu 215123, China

\*Address correspondence to:

André E. Nel, M.D./Ph.D.

Department of Medicine, Division of NanoMedicine, UCLA School of Medicine, 52-175 CHS, 10833 Le Conte Ave, Los Angeles, CA 90095-1680, USA

Tel: (310) 825-6620, Fax: (310) 206-8107

E-mail: [anel@mednet.ucla.edu](mailto:anel@mednet.ucla.edu)

## Materials and Methods

### ICP-OES Analysis to Determine III-V Particles Dissolution in the Lung Simulated Fluids:

ICP-OES was used to assess the release of III-V elements from particles in simulated bronchoalveolar lavage fluid (sBALF) as well as simulated lung interstitial fluid (Gamble's solution) *in vitro*. The stock suspensions of micron- and nano-sized GaAs and InAs particles, at 10 mg/mL, were diluted in sBALF and Gamble's solution to obtain 50 µg/mL suspensions, which were incubated in a humidified atmosphere containing 5% CO<sub>2</sub> at 37 °C for 0, 24 and 40 h. After centrifugation at 15,000 rpm for 60 minutes, the supernatants were transferred to clean tubes (SC475, Environmental Express) for acid digestion. Briefly, 10 mL HNO<sub>3</sub> (65–70%) was used for sample digestion at 80 °C for 6 h, followed by evaporation of all liquids at 95 °C. The dried samples were diluted by 2% (v/v) nitric acid for 3 h to extract the analytes. These extracts were transferred to 15 mL ICP-OES tubes and additional HNO<sub>3</sub> was added to reach a final volume of 8 mL. A calibration curve was established using a standard As, Ga and In solution (Elements Inc., 100 mg/L in 2% HNO<sub>3</sub>). Each sample and standard was analyzed in triplicate in the presence of 2% (v/v) nitric acid. All the elements dissolved content was normalized based on the original concentration at 0 h.

**Statistical Analysis:** All the experiments were performed in triplicate with results expressed as mean ± standard deviation (SD). Statistical significance was evaluated using two-tailed heteroscedastic Student's t-tests according to the TTEST function in Microsoft Excel. Statistically significant results were considered as p<0.05.

## Supplementary Table

**Table S1.** Itemized list of 102 human cytokines, chemokines, and acute phase proteins in Proteome Profiler™ Human XL Cytokine Array Kit.

|                             |                     |                        |                    |                  |
|-----------------------------|---------------------|------------------------|--------------------|------------------|
| Adiponectin                 | Endoglin            | IL-4                   | IP-10/CXCL10       | RAGE             |
| Aggrecan                    | Fas Ligand          | IL-5                   | I-TAC/CXCL11       | CCL5/RANTES      |
| Angiogenin                  | FGF basic           | IL-6                   | Kallikrein 3/PSA   | RBP4             |
| Angiopoietin-1              | FGF-7               | IL-8                   | Leptin             | Relaxin-2        |
| Angiopoietin-2              | FGF-19              | IL-10                  | LIF                | Resistin         |
| BAFF                        | Flt-3 Ligand        | IL-11                  | Lipocalin-2/NGAL   | SDF-1 alpha      |
| BDNF                        | G-CSF               | IL-12 p70              | MCP-1/CCL2         | Serpin E1/PAI-1  |
| Complement Component C5/C5a | GDF-15              | IL-13                  | MCP-3/CCL7         | SHBG             |
| CD14                        | GM-CSF              | IL-15                  | M-CSF              | ST2              |
| CD30                        | GRO $\alpha$        | IL-16                  | MIF                | TARC             |
| CD40 Ligand                 | Growth Hormone (GH) | IL-17A                 | MIG/CXCL9          | TFF3             |
| Chitinase 3-like 1          | HGF                 | IL-18 BPa              | MIP-1 alpha/beta   | TfR              |
| Complement Factor D         | ICAM-1/CD54         | IL-19                  | MIP-3 alpha        | TGF-alpha        |
| C-Reactive Protein/CRP      | IFN-gamma           | IL-22                  | MIP-3 beta         | Thrombospondin-1 |
| Cripto-1                    | IGFBP-2             | IL-23                  | MMP-9              | TNF-alpha        |
| Cystatin C                  | IGFBP-3             | IL-24                  | Myeloperoxidase    | uPAR             |
| Dkk-1                       | IL-1 alpha          | IL-27                  | Osteopontin (OPN)  | VEGF             |
| DPPIV                       | IL-1 beta           | IL-31                  | PDGF-AA            | Vitamin D BP     |
| EGF                         | IL-1ra              | IL-32 alpha/beta/gamma | PDGF-AB/BB         |                  |
| EMMPRIN                     | IL-2                | IL-33                  | Pentraxin 3/TSF-14 |                  |
| ENA-78                      | IL-3                | IL-34                  | PF4                |                  |

## Supplementary Figures

Figure S1

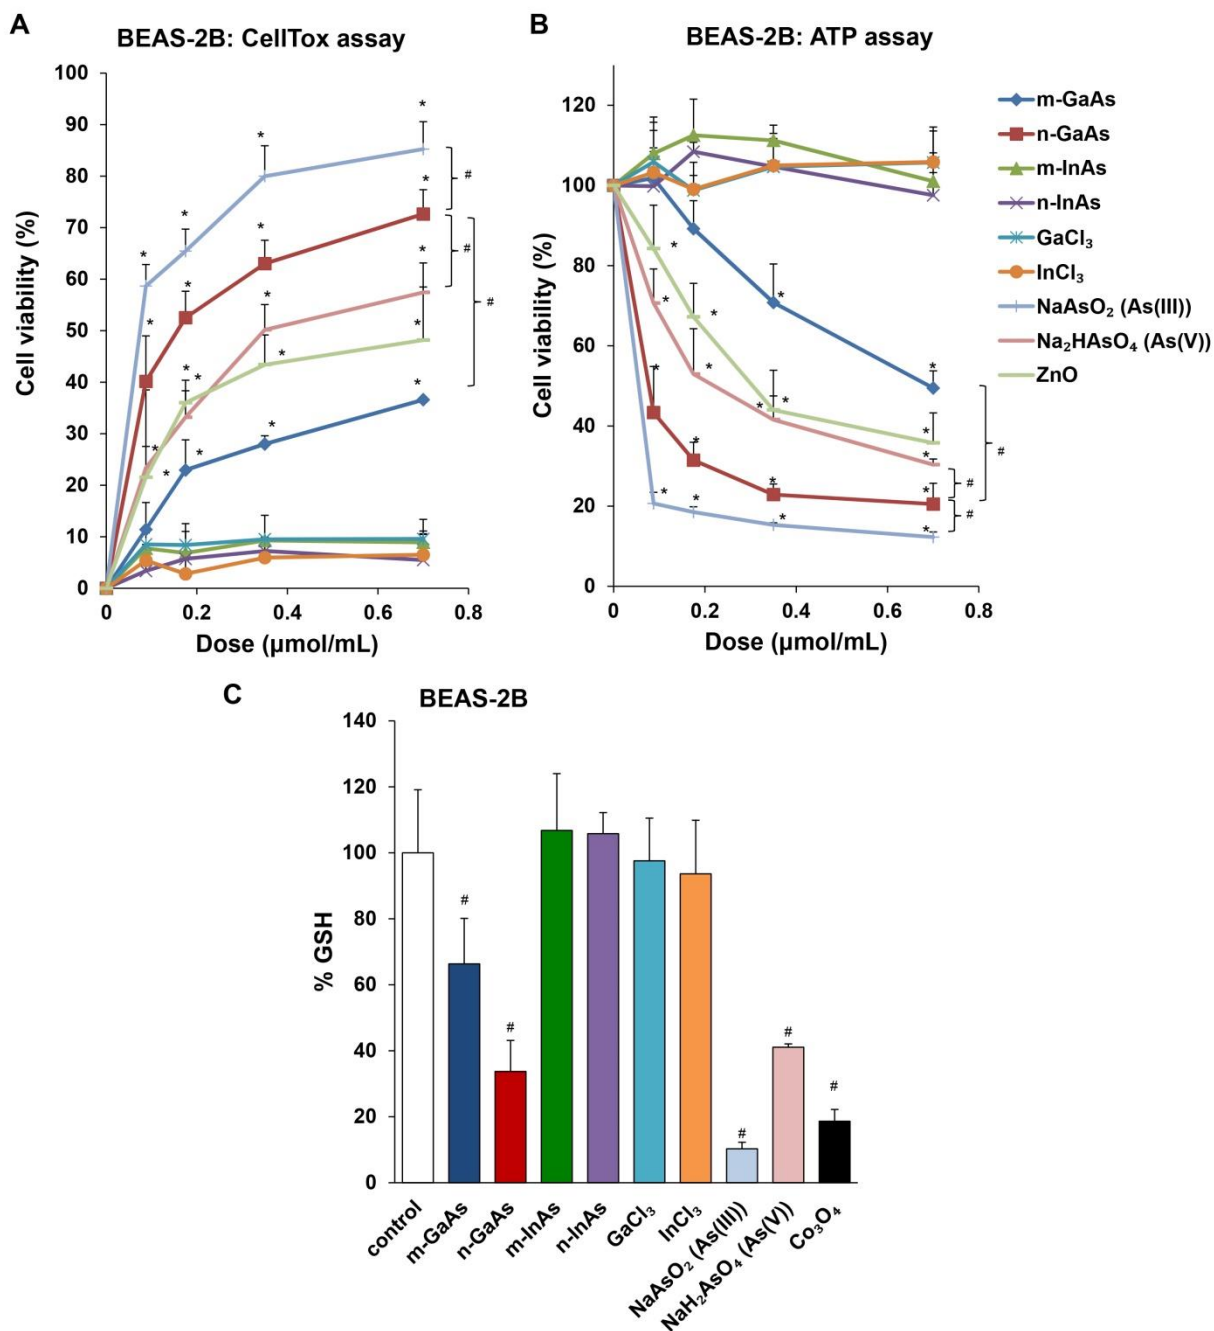

**Figure S1.** Assessment of cell viability and GSH content in BEAS-2B cells following exposure to III-V particles and ionic forms. (A) Assessment of BEAS-2B cell death by the CellTox assay. (B) Assessment of BEAS-2B cell viability by the ATP assay. The III-V materials were added to

the cell culture media at 0.07-0.7  $\mu\text{mol/mL}$  for 24 h. The corresponding mass doses are listed in Table 3. (\*)  $p < 0.05$  compared to control; (#)  $p < 0.05$  compared to n-GaAs. (C) Intracellular GSH depletion in BEAS-2B cells was determined by luminescence-based GSH-Glo kit. The cells were exposed to III-V materials at 0.35  $\mu\text{mol/mL}$  (=50  $\mu\text{g/mL}$  GaAs) for 24 h. GSH abundance was calculated as the fractional luminescence intensity of treated *versus* untreated cells (in which the abundance was regarded as 1.0). (#)  $p < 0.05$  compared to BEAS-2B control cells.

Figure S2

A. THP-1 at 24 h (dose 0.173  $\mu\text{mol/mL}$ )

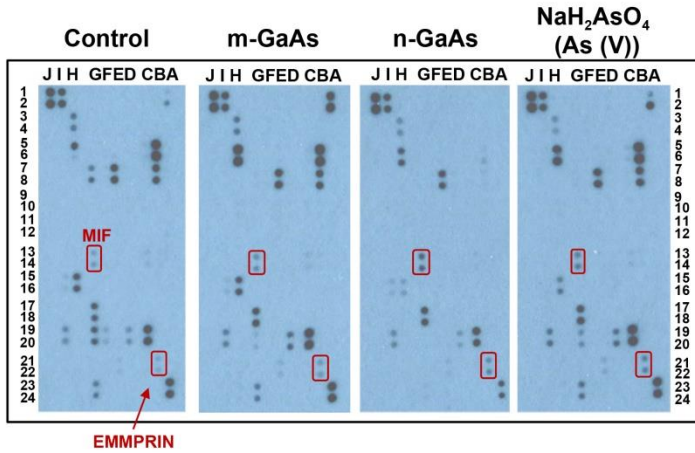

| No. | Cytokines           | Coordinate |
|-----|---------------------|------------|
| 1   | Chitinase 3-like 1  | B5, B6     |
| 2   | Complement Factor D | B7, B8     |
| 3   | EMMPRIN             | B21, B22   |
| 4   | GDF-15              | C19, C20   |
| 5   | IL-1ra              | D19, D20   |
| 6   | IL-8                | E7, E8     |
| 7   | IL-17A              | E21, E22   |
| 8   | IP-10               | F19, F20   |
| 9   | MCP-1               | G7, G8     |
| 10  | MIF                 | G13, G14   |
| 11  | MIP-1a/MIP-1b       | G17, G18   |
| 12  | MIP-3a              | G19, G20   |
| 13  | MMP-9               | G23, G24   |
| 14  | Osteopontin         | H3, H4     |
| 15  | PDGF-AA             | H5, H6     |
| 16  | RANTES              | H15, H16   |
| 17  | Serpin E1           | I1, I2     |
| 18  | uPAR                | I19, I20   |

B THP-1 at 24 h (0.173  $\mu\text{mol/mL}$ )

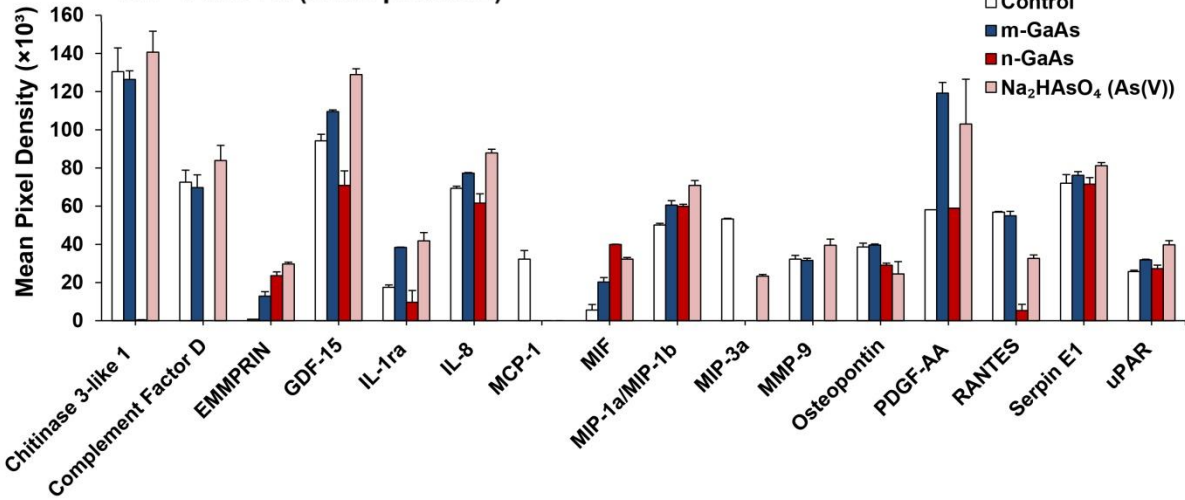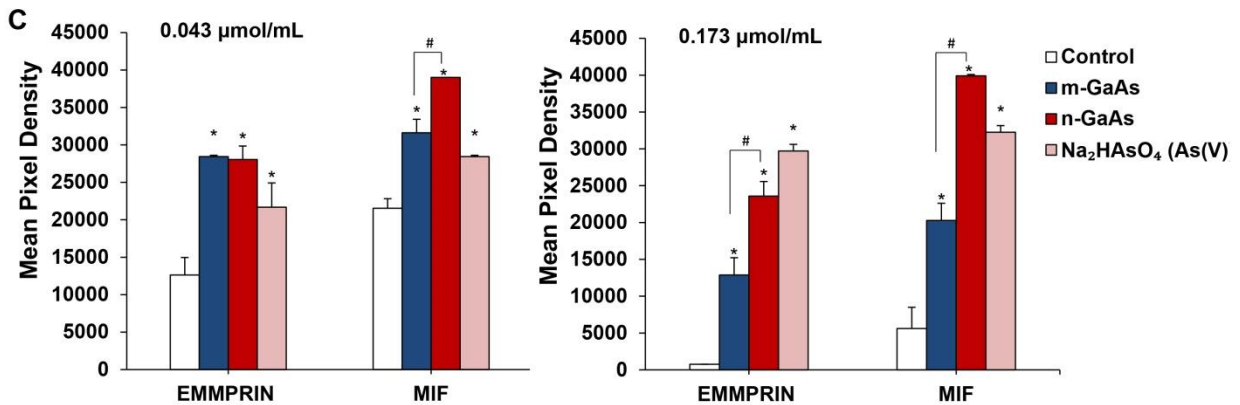

Figure S2. Proteome Profiler Human XL Cytokine Array data for 102 cytokines released from

THP-1 cells 24 h after incubation with 0.173  $\mu\text{mol/mL}$  micron- and nano-sized GaAs, as well as  $\text{NaH}_2\text{AsO}_4$  (As (V)). (A) X-ray analysis of cytokine array films (left) after 2 minutes of exposure. 100  $\mu\text{L}$  of cell culture supernatant was run for duplicate dots for each array. Pixel density spots were created using an Epson Perfection V500 Photo Scanner and ImageJ 1.46r analysis software. Altogether 18 human cytokines could be detected in THP-1 supernatants (right), among which there were pixel density increases for EMMPRIN (B21, B22) and MIF (G13, G14). (B) Semi-quantitative expression of the pixel density of the 18 cytokines by ImageJ analysis. (C) Semi-quantitative expression of the pixel densities of EMMPRIN and MIF level at exposure doses of 0.043 and 0.173  $\mu\text{mol/mL}$ . (\*)  $p < 0.05$  compared to control. (#)  $p < 0.05$  compared to n-GaAs.

**Figure S3**

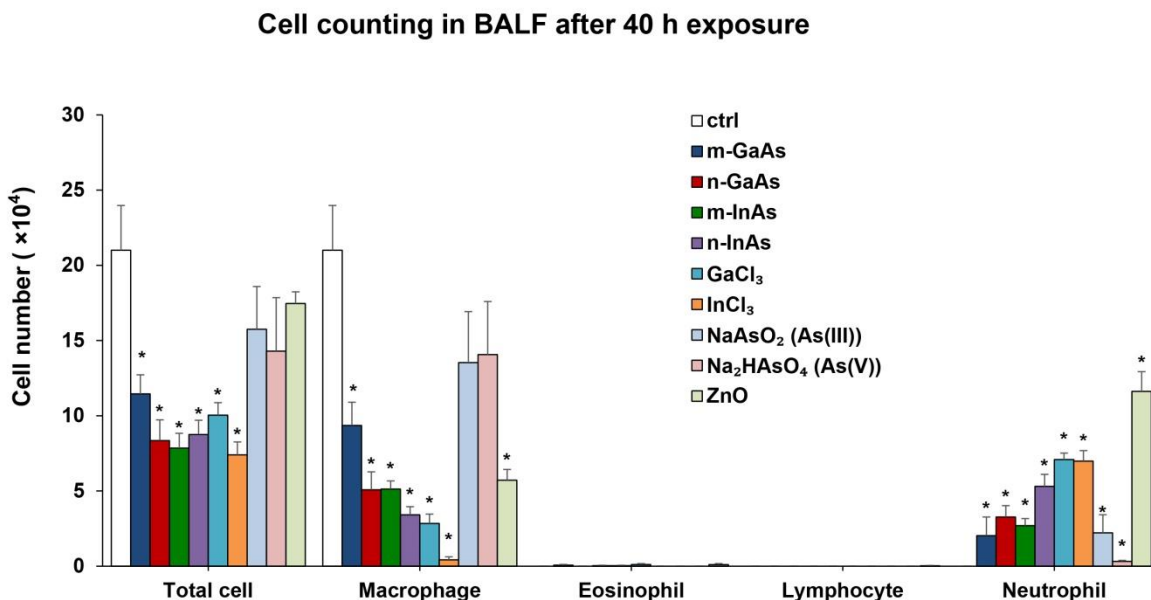

**Figure S3.** Acute pulmonary effects of III-V materials, 40 h following exposure to a dose of 0.014 mmol/kg. Differential cell counts were performed in the BALF. These data were collected from the same experiment described in Figure 4. There were 6 C57BL/6 mice in each group. Animals were euthanized after 40 h to collect the BALF. ZnO served as a positive control. Exposure to micron- and nano-sized GaAs and InAs particles, GaCl<sub>3</sub> and InCl<sub>3</sub> led to a significant reduction of the total and macrophage cell counts compared to control or the As(III) and As(V) treated groups. All the III-V materials triggered an increase in neutrophil counts. (\*) p < 0.05 compared to control.



**Figure S4**

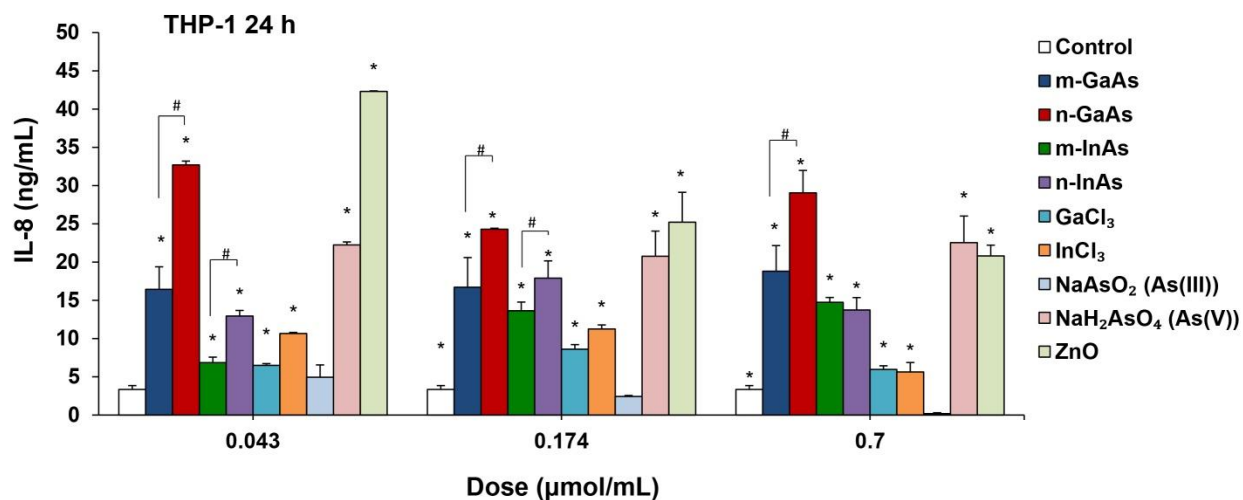

**Figure S4.** IL-8 production in THP-1 cells. After 24 h, cells were exposed to the particulate and ionic III-V materials at concentrations of 0.043, 0.174 and 0.7  $\mu\text{mol/mL}$ . The corresponding mass doses are listed in Table 3. ZnO NPs were used as a positive control. IL-8 levels in the cell culture supernatant were determined by ELISA. (\*)  $p < 0.05$  compared to control. (#)  $p < 0.05$  compared to nano-sized III-V particles.

**Figure S5**

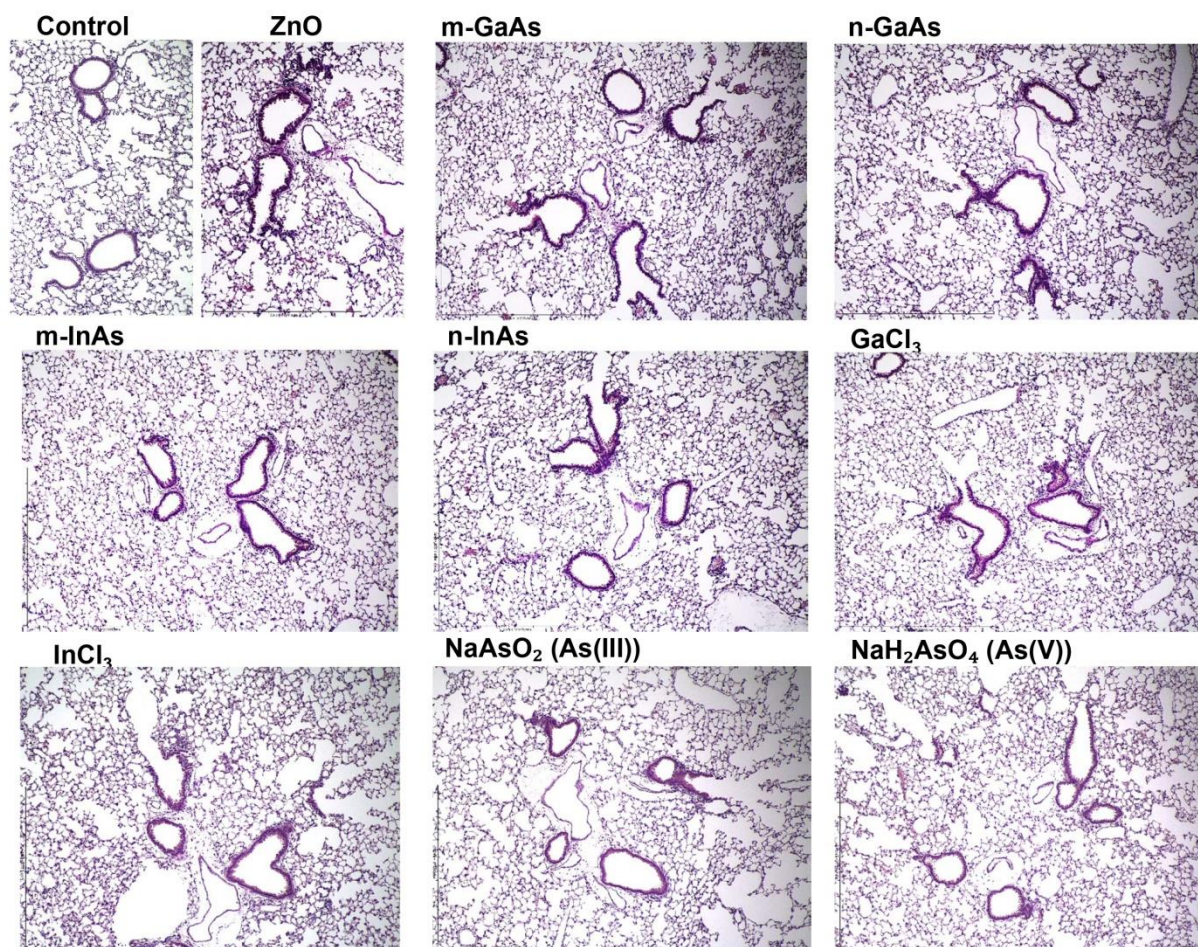

**Figure S5.** Tissue sectioning and H&E staining of the lungs 40 h after exposure to III-V materials. The selected images at 100× magnification are representative of the histological response in each group.

Figure S6

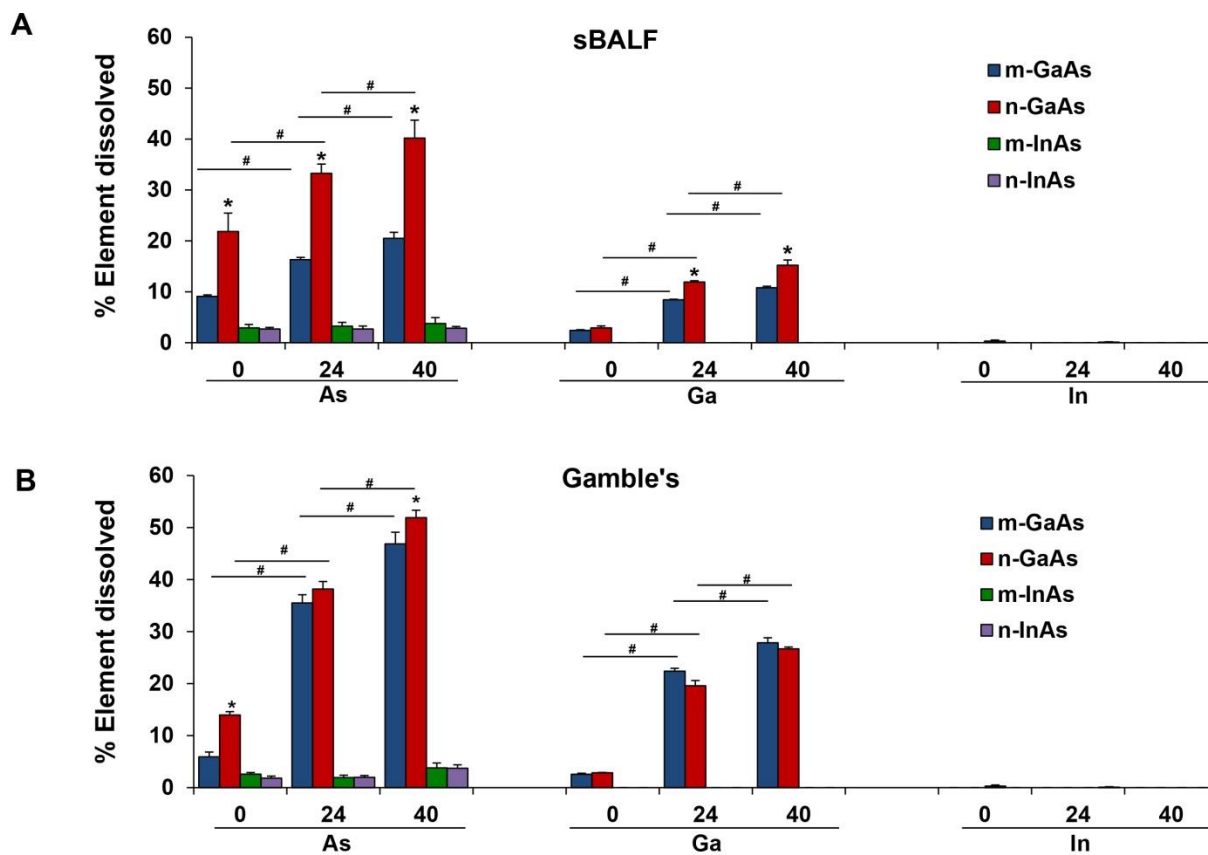

**Figure S6.** ICP-OES analysis to determine the dissolution of micron- and nano-sized GaAs and InAs at 0, 24 and 40 h in simulated bronchoalveolar lavage fluid (sBALF) (A) as well as simulated interstitial lung fluid (Gamble's solution) (B). (\*)  $p < 0.05$  compared to control. (#)  $p < 0.05$  compared to 24 h incubation.

**Figure S7**

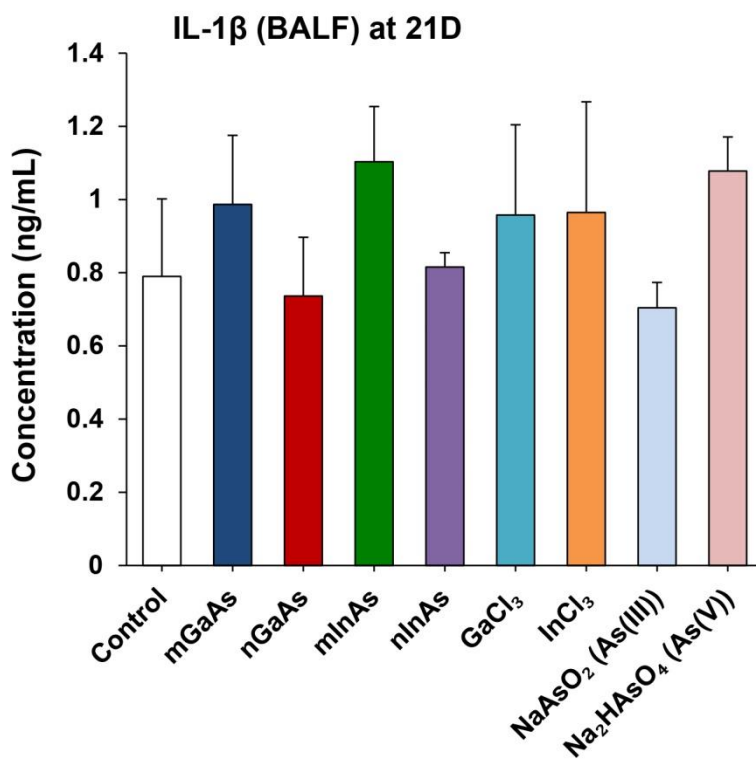

**Figure S7.** IL-1 $\beta$  levels in the BALF of mice 21 days after oropharyngeal installation of the indicated materials at 0.014 mmol/kg (=2 mg/kg GaAs). The corresponding mass doses are listed in Table 3. These data were collected from the same experiment as in Figure 6. There were 6 animals per group. Animals were euthanized 21 D after initial exposure to collect the BALF. IL-1 $\beta$  levels were determined by ELISA. There was no significant difference for the IL-1 $\beta$  production among III-V materials compared to control group.

Figure S8

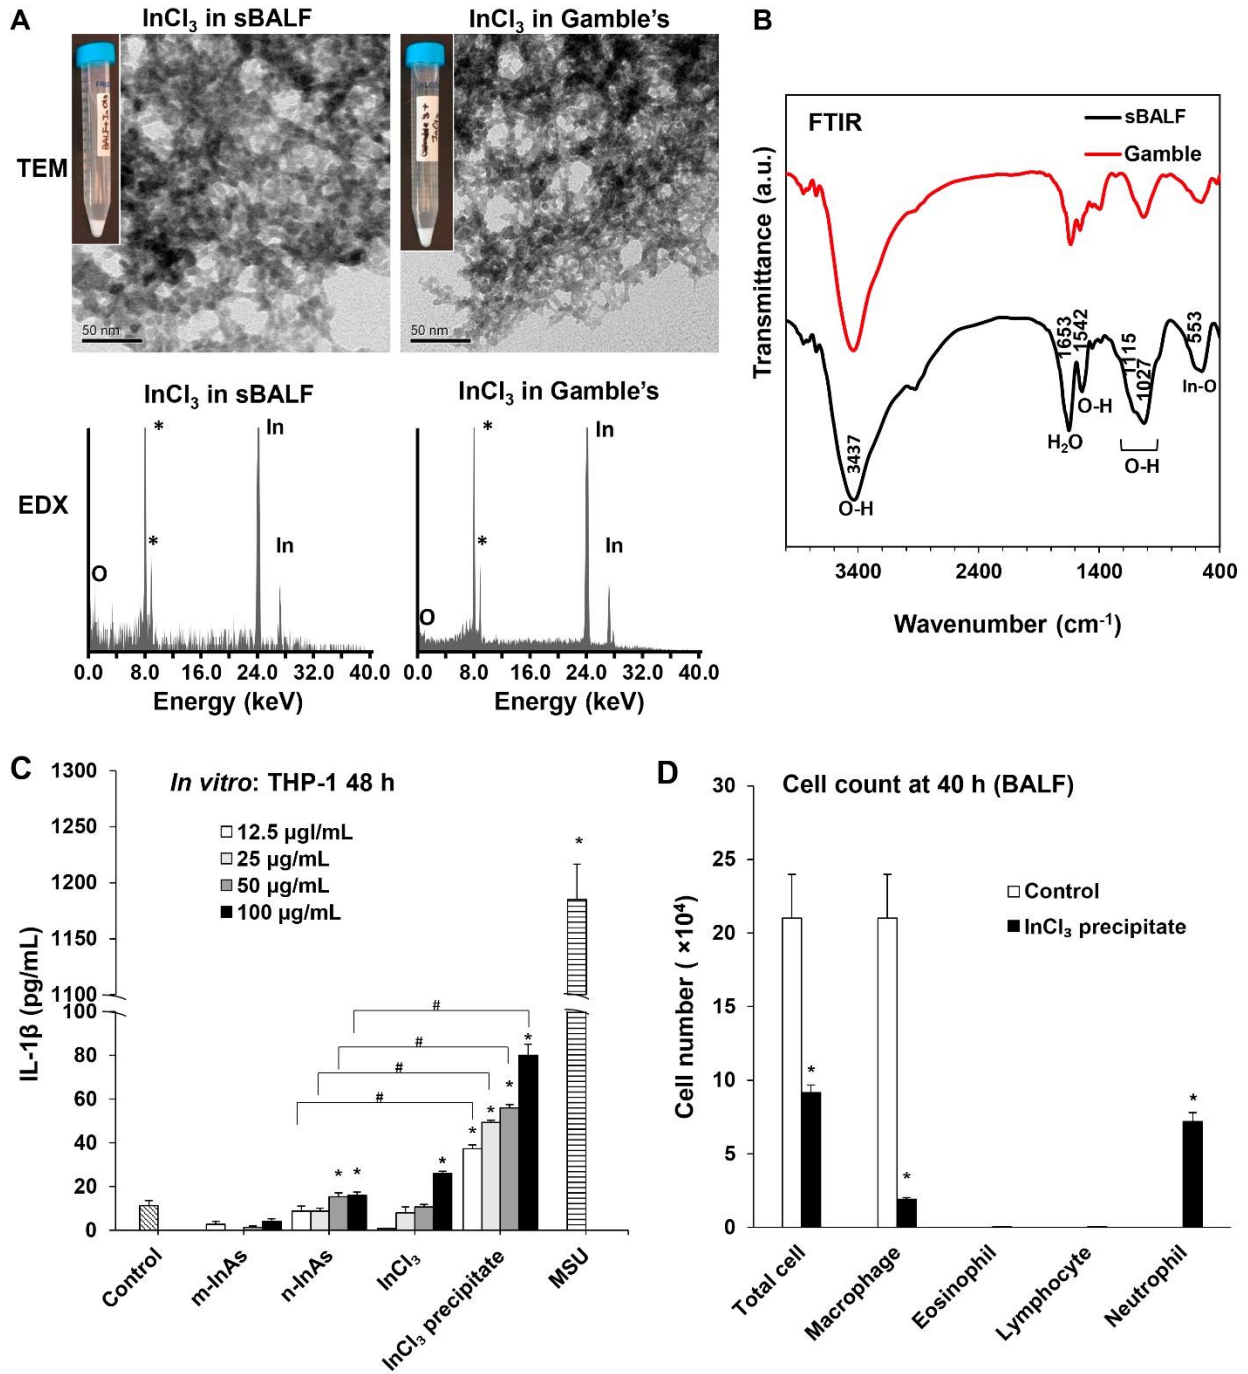

**Figure S8**

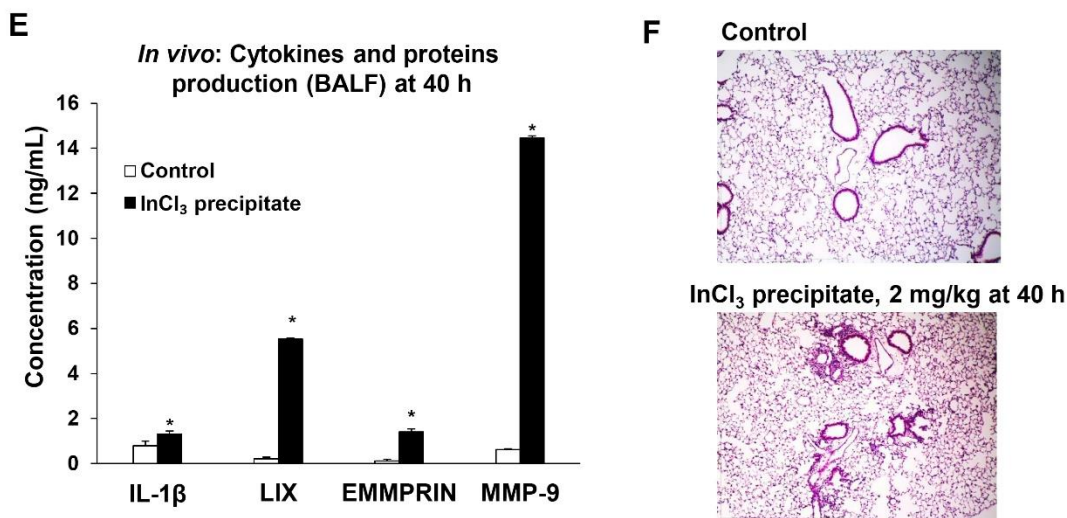

**Figure S8.** Formation of insoluble In(OH)<sub>3</sub> precipitates in simulated bronchoalveolar lavage fluid (sBALF) and simulated interstitial lung fluid (Gamble's solution), as well as their pulmonary effects in the murine lung. (A) TEM and EDX characterization of InCl<sub>3</sub> precipitates in sBALF and Gamble's solution *in vitro*. The precipitates were collected by centrifugation 24 h after the incubation in each of the simulated fluids. The precipitates were re-suspended at 50  $\mu$ g/mL and applied to TEM grids using a JEOL 2010 microscope operated at 200 keV. Scale bars represent 50 nm. EDX demonstrated that the precipitates contained In and O only. (B) FTIR characterization confirmed that the precipitates formed in sBALF and Gamble's solution (*in vitro*) were In(OH)<sub>3</sub>. (C) InCl<sub>3</sub> precipitates in sBALF induced higher IL-1 $\beta$  production than InAs and InCl<sub>3</sub> in THP-1 cells after 48 h exposure. (\*)  $p < 0.05$  compared to control. (#)  $p < 0.05$  compared to n-InAs. (D) Acute pulmonary effects of InCl<sub>3</sub> precipitates as reflected by differential cell counts in the BALF after 40 h. Anesthetized C57BL/6 mice were exposed to InCl<sub>3</sub> precipitates at 2 mg/kg by oropharyngeal aspiration. There were 6 animals per group. Animals were euthanized after 40 h, and BALF was collected to determine differential cell counts. (\*)  $p < 0.05$  compared to control. (E) IL-1 $\beta$ , LIX, EMMPRIN and MMP-9 levels in BALF as determined by ELISA assay. (\*)  $p < 0.05$  compared to control. (F) H&E stained images (at 100  $\times$ ) of mice lungs exposed to InCl<sub>3</sub> precipitates at the dose of 2 mg/kg.

## Supplementary Results and Discussion

The pro-fibrogenic effects of  $\text{InCl}_3$  likely contribute to the pulmonary effects of InAs particles. Even though both Ga and In belong to group III in the periodic table, their biological effects differ.<sup>1-3</sup> Based on the presence of In in the lung tissue by ICP-OES analysis after 48 h and 21 D (Figure 4F, Figure 7C), we hypothesized that the formation of insoluble In compounds could lead to the deposition of a biopersistent In species in the lung. In order to address this theory, Visual MINTEQ software was used to model the chemical speciation of  $\text{InCl}_3$  in the simulated lung fluids (sBALF and Gamble's solution). This analysis suggests the formation of insoluble  $\text{In}(\text{OH})_3$  in both media, which constitutes >99.9% of the In content. In contrast, Ga leads to the formation of ionic form  $\text{Ga}(\text{OH})_4^-$  (>99.9%) in both media. The phase transition of  $\text{InCl}_3$  to insoluble  $\text{In}(\text{OH})_3$  could play an important role in  $\text{InCl}_3$  toxicity *in vivo*. Using TEM, Energy-dispersive X-ray spectroscopy (EDX) and FTIR characterization (Figure S8A-S8B), we demonstrated that  $\text{InCl}_3$  indeed leads to the formation of nanoscale  $\text{In}(\text{OH})_3$  precipitates in sBALF and Gamble's solution. The pro-inflammatory potential of  $\text{InCl}_3$  precipitates was demonstrated by the ability of this material to induce IL-1 $\beta$  production in THP-1 cells (Figure S8C). Moreover, oropharyngeal aspiration in mice demonstrates after 40 h the presence of  $\text{InCl}_3$  precipitates increased neutrophil cell counts in the BALF (Figure S8D), along with increased production of IL-1 $\beta$ , LIX, EMMPRIN and MMP-9 (Figure S8E). H&E staining confirmed the pro-IL-1 $\beta$  presence of cellular infiltrates around alveoli and blood vessels in response to  $\text{InCl}_3$  precipitates (Figure S8F). All considered, we propose that the biopersistence of  $\text{In}(\text{OH})_3$ , following its phase transition from  $\text{InCl}_3$ , leads to pro-fibrotic effects as a result of the production of IL-1 $\beta$  and downstream triggering of pro-fibrogenic growth factors.

## Supplementary References

1. Tanaka, A., Toxicity of Indium Arsenide, Gallium Arsenide, and Aluminium Gallium Arsenide. *Toxicol. Appl. Pharmacol.* **2004**, *198*, 405-411.
2. Omura, M.; Tanaka, A.; Hirata, M.; Zhao, M. G.; Makita, Y.; Inoue, N.; Gotoh, K.; Ishinishi, N., Testicular Toxicity of Gallium Arsenide, Indium Arsenide, and Arsenic Oxide in Rats by Repetitive Intratracheal Instillation. *Fundam. Appl. Toxicol.* **1996**, *32*, 72-78.
3. Tanaka, A.; Hisanaga, A.; Hirata, M.; Omura, M.; Makita, Y.; Inoue, N.; Ishinishi, N., Chronic Toxicity of Indium Arsenide and Indium Phosphide to the Lungs of Hamsters. *Fukuoka Acta Medica* **1996**, *87*, 108-115.
